# Supplementary material for: New insights on congenital pulmonary airways malformations revealed by proteomic analyses
Source: Springer Nature journal article supplement (doi:10.1186/s13023-019-1192-4), 2019-11-28

Figure S1

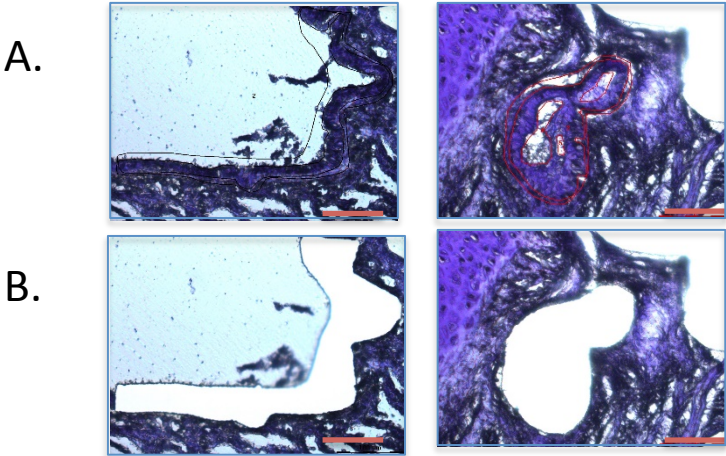

Supplement: MOESM1 [file 17445884]
