# Supplementary material for: New insights on congenital pulmonary airways malformations revealed by proteomic analyses
Source: Springer Nature journal article supplement (doi:10.1186/s13023-019-1192-4), 2019-11-28
Supplement: MOESM2 [file 17445884]

Figure S2

A.

|    | Accession | Protein name | Gene Name                                                                     | Sequence length (a.a.) |      |
|----|-----------|--------------|-------------------------------------------------------------------------------|------------------------|------|
| 1  | P60709    | ACTB_HUMAN   | Actin, cytoplasmic 1 (Beta-actin)                                             | ACTB                   | 375  |
| 2  | P02768    | ALBU_HUMAN   | Serum albumin                                                                 | ALB                    | 609  |
| 3  | P00352    | AL1A1_HUMAN  | Retinal dehydrogenase 1 (RALDH 1)                                             | ALDH1A1                | 501  |
| 4  | P04083    | ANXA1_HUMAN  | Annexin A1 (Annexin I)                                                        | ANXA1                  | 346  |
| 5  | P07355    | ANXA2_HUMAN  | Annexin A2 (Annexin II)                                                       | ANXA2                  | 339  |
| 6  | P09525    | ANXA4_HUMAN  | Annexin A4 (35-beta calcimedien)                                              | ANXA4                  | 319  |
| 7  | P25705    | ATPA_HUMAN   | ATP synthase subunit alpha, mitochondrial                                     | ATP5F1A                | 553  |
| 8  | Q13938    | CAYP1_HUMAN  | Calcyphosin (Calcyphosine)                                                    | CAPS                   | 275  |
| 9  | P12111    | CO6A3_HUMAN  | Collagen alpha-3(VI) chain                                                    | COL6A3                 | 3177 |
| 10 | H7B255    | CRCC2_HUMAN  | Putative ciliary rootlet coiled-coil protein 2                                | CROCC2                 | 1655 |
| 11 | Q02413    | DSG1_HUMAN   | Desmoglein-1 (Cadherin family member 4)                                       | DSG1                   | 1049 |
| 12 | P15924    | DESP_HUMAN   | Desmoplakin (DP)                                                              | DSP                    | 2871 |
| 13 | P68104    | EF1A1_HUMAN  | Elongation factor 1-alpha 1 (EF-1-alpha-1)                                    | EEF1A1                 | 462  |
| 14 | P15311    | EZRI_HUMAN   | Ezrin (Cytovillin) (Villin-2)                                                 | EZR                    | 586  |
| 15 | P35555    | FBN1_HUMAN   | Fibrillin-1                                                                   | FBN1                   | 2871 |
| 16 | P21333    | FLNA_HUMAN   | Filamin-A (FLN-A)                                                             | FLNA                   | 2647 |
| 17 | P69905    | HBA_HUMAN    | Hemoglobin subunit alpha (Alpha-globin)                                       | HBA1                   | 142  |
| 18 | P68871    | HBB_HUMAN    | Hemoglobin subunit beta (Beta-globin)                                         | HBB                    | 147  |
| 19 | P62805    | H4_HUMAN     | Histone H4                                                                    | HIST1H4A               | 103  |
| 20 | P22626    | ROA2_HUMAN   | Heterogeneous nuclear ribonucleoproteins A2/B1 (hnRNP A2/B1)                  | HNRNPA2B1              | 353  |
| 21 | P61978    | HNRPK_HUMAN  | Heterogeneous nuclear ribonucleoprotein K (hnRNP K)                           | HNRNPK                 | 463  |
| 22 | Q86Y23    | HORN_HUMAN   | Hornerin                                                                      | HRNR                   | 2850 |
| 23 | P07900    | HS90A_HUMAN  | Heat shock protein HSP 90-alpha (Heat shock 86 kDa)                           | HSP90AA1               | 732  |
| 24 | P0DMV8    | HS71A_HUMAN  | Heat shock 70 kDa protein 1A (Heat shock 70 kDa protein 1)                    | HSPA1A                 | 641  |
| 25 | P04792    | HSPB1_HUMAN  | Heat shock protein beta-1 (HspB1)                                             | HSPB1                  | 205  |
| 26 | P14923    | PLAK_HUMAN   | Junction plakoglobin (Catenin gamma) (Desmoplakin III)                        | JUP                    | 745  |
| 27 | P04264    | K2C1_HUMAN   | Keratin, type II cytoskeletal 1                                               | KRT1                   | 644  |
| 28 | P13645    | K1C10_HUMAN  | Keratin, type I cytoskeletal 10 (Cytokeratin-10)                              | KRT10                  | 584  |
| 29 | P02533    | K1C14_HUMAN  | Keratin, type I cytoskeletal 14 (Cytokeratin-14) (CK-14) (Keratin-14) (K14)   | KRT14                  | 472  |
| 30 | P08779    | K1C16_HUMAN  | Keratin, type I cytoskeletal 16 (Cytokeratin-16)                              | KRT16                  | 473  |
| 31 | Q04695    | K1C17_HUMAN  | Keratin, type I cytoskeletal 17 (39.1) (Cytokeratin-17)                       | KRT17                  | 432  |
| 32 | P08727    | K1C19_HUMAN  | Keratin, type I cytoskeletal 19 (Cytokeratin-19)                              | KRT19                  | 400  |
| 33 | P35908    | K2E_HUMAN    | Keratin, type II cytoskeletal 2 epidermal (Cytokeratin-2e)                    | KRT2                   | 639  |
| 34 | P13647    | K2C5_HUMAN   | Keratin, type II cytoskeletal 5 (58 kDa cytokeatin) (Cytokeratin-5)           | KRT5                   | 590  |
| 35 | P02538    | K2C6A_HUMAN  | Keratin, type II cytoskeletal 6A (Cytokeratin-6A)                             | KRT6A                  | 564  |
| 36 | P04259    | K2C6B_HUMAN  | Keratin, type II cytoskeletal 6B (Cytokeratin-6B)                             | KRT6B                  | 564  |
| 37 | P48668    | K2C6C_HUMAN  | Keratin, type II cytoskeletal 6C (Cytokeratin-6C)                             | KRT6C                  | 564  |
| 38 | P08729    | K2C7_HUMAN   | Keratin, type II cytoskeletal 7 (Cytokeratin-7)                               | KRT7                   | 469  |
| 39 | P05787    | K2C8_HUMAN   | Keratin, type II cytoskeletal 8 (Cytokeratin-8)                               | KRT8                   | 483  |
| 40 | P35527    | K1C9_HUMAN   | Keratin, type I cytoskeletal 9 (Cytokeratin-9)                                | KRT9                   | 623  |
| 41 | P02545    | LMNA_HUMAN   | Prelamin-A/C [Cleaved into: Lamin-A/C (70 kDa lamin)]                         | LMNA                   | 664  |
| 42 | P35579    | MYH9_HUMAN   | Myosin-9 (Cellular myosin heavy chain, type A) (NMMHC-A)                      | MYH9                   | 1960 |
| 43 | P14618    | KPYM_HUMAN   | Pyruvate kinase PKM (EC 2.7.1.40) (Cytosolic thyroid hormone-binding protein) | PKM                    | 531  |
| 44 | Q15149    | PLEC_HUMAN   | Plectin (PCN) (PLTN)                                                          | PLEC                   | 4684 |
| 45 | Q06830    | PRDX1_HUMAN  | Peroxiredoxin-1 (EC 1.11.1.15) (Natural killer cell-enhancing factor A)       | PRDX1                  | 199  |
| 46 | P60174    | TPI5_HUMAN   | Triosephosphate isomerase (TIM)                                               | TPI1                   | 286  |
| 47 | Q71U36    | TBA1A_HUMAN  | Tubulin alpha-1A chain (Alpha-tubulin 3) (Tubulin B-alpha-1)                  | TUBA1A                 | 451  |
| 48 | P68371    | TBB4B_HUMAN  | Tubulin beta-4B chain (Tubulin beta-2 chain)                                  | TUBB4B                 | 445  |
| 49 | P0CG47    | UBB_HUMAN    | Polyubiquitin-B                                                               | UBB                    | 229  |
| 50 | P08670    | VIME_HUMAN   | Vimentin                                                                      | VIM                    | 466  |

B.

|    | Accession | Protein name | Gene Name                                                                   | Sequence length (a.a.) |      |
|----|-----------|--------------|-----------------------------------------------------------------------------|------------------------|------|
| 1  | P60709    | ACTB_HUMAN   | Actin, cytoplasmic I (Beta-actin)                                           | ACTB                   | 375  |
| 2  | P68032    | ACTC_HUMAN   | Actin, alpha cardiac muscle 1 (Alpha-cardiac actin)                         | ACTC1                  | 377  |
| 3  | Q09666    | AHMK_HUMAN   | Neuroblast differentiation-associated protein AHNAK (Desmoyokin)            | AHNAK                  | 5890 |
| 4  | P02768    | ALBU_HUMAN   | Serum albumin                                                               | ALB GIG20              | 609  |
| 5  | P04083    | ANXA1_HUMAN  | Annexin A1 (Annexin I) (Annexin-1) (Calpactin II)                           | ANXA1 ANX1 LPC1        | 346  |
| 6  | P07355    | ANXA2_HUMAN  | Annexin A2 (Annexin II) (Annexin-2)                                         | ANXA2                  | 339  |
| 7  | P09525    | ANXA4_HUMAN  | Annexin A4 (35-beta calcimedlin) (Annexin IV) (Annexin-4)                   | ANXA4                  | 319  |
| 8  | Q13938    | CAYP1_HUMAN  | Calcyphosin (Calcyphosine)                                                  | CAPS                   | 275  |
| 9  | P12111    | CO6A3_HUMAN  | Collagen alpha-3(VI) chain                                                  | COL6A3                 | 3177 |
| 10 | P15924    | DESP_HUMAN   | Desmoplakin (DP)                                                            | DSP                    | 2871 |
| 11 | P68104    | EF1A1_HUMAN  | Elongation factor 1-alpha 1 (EF-1-alpha-1)                                  | EEF1A1                 | 462  |
| 12 | P35555    | FBN1_HUMAN   | Fibrillin-1                                                                 | FBN1                   | 2871 |
| 13 | P21333    | FLNA_HUMAN   | Filamin-A (FLN-A)                                                           | FLNA                   | 2647 |
| 14 | P02751    | FINC_HUMAN   | Fibronectin (FN)                                                            | FN1                    | 2386 |
| 15 | P69905    | HBA_HUMAN    | Hemoglobin subunit alpha (Alpha-globin)                                     | HBA1                   | 142  |
| 16 | P68871    | HBB_HUMAN    | Hemoglobin subunit beta (Beta-globin)                                       | HBB                    | 147  |
| 17 | P62805    | H4_HUMAN     | Histone H4                                                                  | HIST1H4A               | 103  |
| 18 | P22626    | ROA2_HUMAN   | Heterogeneous nuclear ribonucleoproteins A2/B1 (hnRNP A2/B1)                | HNRNPA2B1              | 353  |
| 19 | Q86Y23    | HORN_HUMAN   | Hornerin                                                                    | HNRN                   | 2850 |
| 20 | P07900    | H590A_HUMAN  | Heat shock protein HSP 90-alpha (HSP 86) (HSP86)                            | HSP90AA1               | 732  |
| 21 | P0DMV8    | H571A_HUMAN  | Heat shock 70 kDa protein 1A (HSP70-1)                                      | HSPA1A                 | 641  |
| 22 | P11021    | BIP_HUMAN    | Endoplasmic reticulum chaperone BIP (EC 3.6.4.10)                           | HSPA5                  | 654  |
| 23 | P98160    | PGBM_HUMAN   | Basement membrane-specific heparan sulfate proteoglycan core protein (HSPG) | HSPG2                  | 4391 |
| 24 | P04264    | K2C1_HUMAN   | Keratin, type II cytoskeletal 1 (CK-1)                                      | KRT1                   | 644  |
| 25 | P13645    | K1C10_HUMAN  | Keratin, type I cytoskeletal 10 (CK-10)                                     | KRT10                  | 584  |
| 26 | P13646    | K1C13_HUMAN  | Keratin, type I cytoskeletal 13 (CK-13)                                     | KRT13                  | 458  |
| 27 | P02533    | K1C14_HUMAN  | Keratin, type I cytoskeletal 14 (CK-14)                                     | KRT14                  | 472  |
| 28 | P08779    | K1C16_HUMAN  | Keratin, type I cytoskeletal 16 (CK-16)                                     | KRT16                  | 473  |
| 29 | Q04695    | K1C17_HUMAN  | Keratin, type I cytoskeletal 17 (CK-17)                                     | KRT17                  | 432  |
| 30 | P08727    | K1C19_HUMAN  | Keratin, type I cytoskeletal 19 (CK-19)                                     | KRT19                  | 400  |
| 31 | P35908    | K22E_HUMAN   | Keratin, type II cytoskeletal 2 epidermal (CK-2e)                           | KRT2                   | 639  |
| 32 | P13647    | K2C5_HUMAN   | Keratin, type II cytoskeletal 5 (CK-5)                                      | KRT5                   | 590  |
| 33 | P02538    | K2C6A_HUMAN  | Keratin, type II cytoskeletal 6A (CK-6A)                                    | KRT6A                  | 564  |
| 34 | P04259    | K2C6B_HUMAN  | Keratin, type II cytoskeletal 6B (CK-6B)                                    | KRT6B                  | 564  |
| 35 | P48668    | K2C6C_HUMAN  | Keratin, type II cytoskeletal 6C (CK-6C)                                    | KRT6C                  | 564  |
| 36 | P08729    | K2C7_HUMAN   | Keratin, type II cytoskeletal 7 (CK-7)                                      | KRT7                   | 469  |
| 37 | P05787    | K2C8_HUMAN   | Keratin, type II cytoskeletal 8 (CK-8)                                      | KRT8                   | 483  |
| 38 | P35527    | K1C9_HUMAN   | Keratin, type I cytoskeletal 9 (CK-9)                                       | KRT9                   | 623  |
| 39 | P02545    | LMNA_HUMAN   | Prelamin-A/C [Cleaved into: Lamin-A/C                                       | LMNA                   | 664  |
| 40 | P35579    | MYH9_HUMAN   | Myosin-9 (Cellular myosin heavy chain, type A)                              | MYH9                   | 1960 |
| 41 | P14618    | KPYM_HUMAN   | Pyruvate kinase PKM (EC 2.7.1.40) (CTHBP)                                   | PKM                    | 531  |
| 42 | Q15149    | PLEC_HUMAN   | Plectin (PCN) (PLTN)                                                        | PLEC                   | 4684 |
| 43 | Q06830    | PRDX1_HUMAN  | Peroxiredoxin-1 (NKEF-A)                                                    | PRDX1                  | 199  |
| 44 | Q01082    | SPTB2_HUMAN  | Spectrin beta chain, non-erythrocytic 1 (Beta-II spectrin)                  | SPTBN1                 | 2364 |
| 45 | P02787    | TRFE_HUMAN   | Serotransferrin (Transferrin)                                               | TF                     | 698  |
| 46 | P60174    | TPIS_HUMAN   | Triosephosphate isomerase (TIM)                                             | TPI1                   | 286  |
| 47 | Q71U36    | TBA1A_HUMAN  | Tubulin alpha-1A chain (Alpha-tubulin 3)                                    | TUBA1A                 | 451  |
| 48 | P68371    | TBB4B_HUMAN  | Tubulin beta-4B chain (Tubulin beta-2 chain)                                | TUBB4B                 | 445  |
| 49 | POCG47    | UBB_HUMAN    | Polyubiquitin-B                                                             | UBB                    | 229  |
| 50 | P08670    | VIME_HUMAN   | Vimentin                                                                    | VIM                    | 466  |

## C.

|    | Accession | Protein name | Gene Name                                                    | Sequence length (a.a.) |      |
|----|-----------|--------------|--------------------------------------------------------------|------------------------|------|
| 1  | P60709    | ACTB_HUMAN   | Actin, cytoplasmic 1 (Beta-actin)                            | ACTB                   | 375  |
| 2  | P68032    | ACTC_HUMAN   | Actin, alpha cardiac muscle 1 (Alpha-cardiac actin)          | ACTC1                  | 377  |
| 3  | P02768    | ALBU_HUMAN   | Serum albumin                                                | ALB                    | 609  |
| 4  | P07355    | ANXA2_HUMAN  | Annexin A2 (Annexin II) (Annexin-2)                          | ANXA2                  | 339  |
| 5  | Q13938    | CAYP1_HUMAN  | Calcyphosin (Calcyphosine)                                   | CAPS                   | 275  |
| 6  | P59665    | DEF1_HUMAN   | Neutrophil defensin 1                                        | DEFA1                  | 94   |
| 7  | Q02413    | DSG1_HUMAN   | Desmoglein-1                                                 | DSG1                   | 1049 |
| 8  | P15924    | DESP_HUMAN   | Desmoplakin (DP)                                             | DSP                    | 2871 |
| 9  | P68104    | EF1A1_HUMAN  | Elongation factor 1-alpha 1 (EF-1-alpha-1)                   | EEF1A1                 | 462  |
| 10 | P06733    | ENOA_HUMAN   | Alpha-enolase                                                | ENO1                   | 434  |
| 11 | P04406    | G3P_HUMAN    | Glyceraldehyde-3-phosphate dehydrogenase                     | GAPDH                  | 335  |
| 12 | P69905    | HBA_HUMAN    | Hemoglobin subunit alpha (Alpha-globin)                      | HBA1                   | 142  |
| 13 | P69892    | HBG2_HUMAN   | Hemoglobin subunit gamma-2                                   | HBG2                   | 147  |
| 14 | Q93077    | H2A1C_HUMAN  | Histone H2A type 1-C                                         | HIST1H2AC              | 130  |
| 15 | O60814    | H2B1K_HUMAN  | Histone H2B type 1-K                                         | HIST1H2BK              | 126  |
| 16 | P62805    | H4_HUMAN     | Histone H4                                                   | HIST1H4A               | 103  |
| 17 | P22626    | ROA2_HUMAN   | Heterogeneous nuclear ribonucleoproteins A2/B1 (hnRNP A2/B1) | HNRNPA2B1              | 353  |
| 18 | P61978    | HNRPK_HUMAN  | Heterogeneous nuclear ribonucleoprotein K                    | HNRNPK                 | 463  |
| 19 | Q86Y23    | HORN_HUMAN   | Hornerin                                                     | HRNR                   | 2850 |
| 20 | P07900    | HS90A_HUMAN  | Heat shock protein HSP 90-alpha (HSP 86) (HSP86)             | HSP90AA1               | 732  |
| 21 | P08238    | HS90B_HUMAN  | Heat shock protein HSP 90-beta                               | HSP90AB1               | 724  |
| 22 | P11021    | BIP_HUMAN    | Endoplasmic reticulum chaperone BIP (EC 3.6.4.10)            | HSPA5                  | 654  |
| 23 | P14923    | PLAK_HUMAN   | Junction plakoglobin                                         | JUP                    | 745  |
| 24 | Q5T749    | KPRP_HUMAN   | Keratinocyte proline-rich protein                            | KPRP                   | 579  |
| 25 | P04264    | K2C1_HUMAN   | Keratin, type II cytoskeletal 1 (CK-1)                       | KRT1                   | 644  |
| 26 | P13645    | K1C10_HUMAN  | Keratin, type I cytoskeletal 10 (CK-10)                      | KRT10                  | 584  |
| 27 | P13646    | K1C13_HUMAN  | Keratin, type I cytoskeletal 13 (CK-13)                      | KRT13                  | 458  |
| 28 | P02533    | K1C14_HUMAN  | Keratin, type I cytoskeletal 14 (CK-14)                      | KRT14                  | 472  |
| 29 | P08779    | K1C16_HUMAN  | Keratin, type I cytoskeletal 16 (CK-16)                      | KRT16                  | 473  |
| 30 | Q04695    | K1C17_HUMAN  | Keratin, type I cytoskeletal 17 (CK-17)                      | KRT17                  | 432  |
| 31 | P08727    | K1C19_HUMAN  | Keratin, type I cytoskeletal 19 (CK-19)                      | KRT19                  | 400  |
| 32 | P35908    | K22E_HUMAN   | Keratin, type II cytoskeletal 2 epidermal (CK-2e)            | KRT2                   | 639  |
| 33 | Q15323    | K1H1_HUMAN   | Keratin, type I cuticular Ha1                                | KRT31                  | 416  |
| 34 | P19013    | K2C4_HUMAN   | Keratin, type II cytoskeletal 4                              | KRT4                   | 534  |
| 35 | P13647    | K2C5_HUMAN   | Keratin, type II cytoskeletal 5 (CK-5)                       | KRT5                   | 590  |
| 36 | P02538    | K2C6A_HUMAN  | Keratin, type II cytoskeletal 6A (CK-6A)                     | KRT6A                  | 564  |
| 37 | P04259    | K2C6B_HUMAN  | Keratin, type II cytoskeletal 6B (CK-6B)                     | KRT6B                  | 564  |
| 38 | P48668    | K2C6C_HUMAN  | Keratin, type II cytoskeletal 6C (CK-6C)                     | KRT6C                  | 564  |
| 39 | Q01546    | K22O_HUMAN   | Keratin, type II cytoskeletal 2 oral                         | KRT76                  | 638  |
| 40 | Q7Z794    | K2C1B_HUMAN  | Keratin, type II cytoskeletal 1b                             | KRT77                  | 578  |
| 41 | Q8N1N4    | K2C78_HUMAN  | Keratin, type II cytoskeletal 78                             | KRT78                  | 520  |
| 42 | P05787    | K2C8_HUMAN   | Keratin, type II cytoskeletal 8 (CK-8)                       | KRT8                   | 483  |
| 43 | P78386    | KRT85_HUMAN  | Keratin, type II cuticular Hb5                               | KRT85                  | 507  |
| 44 | O43790    | KRT86_HUMAN  | Keratin, type II cuticular Hb6                               | KRT86                  | 486  |
| 45 | P35527    | K1C9_HUMAN   | Keratin, type I cytoskeletal 9 (CK-9)                        | KRT9                   | 623  |
| 46 | Q71U36    | TBA1A_HUMAN  | Tubulin alpha-1A chain (Alpha-tubulin 3)                     | TUBA1A                 | 451  |
| 47 | P07437    | TBB5_HUMAN   | Tubulin beta chain (Tubulin beta-5 chain)                    | TUBB                   | 444  |
| 48 | P68371    | TBB4B_HUMAN  | Tubulin beta-4B chain (Tubulin beta-2 chain)                 | TUBB4B                 | 445  |
| 49 | POCG47    | UBB_HUMAN    | Polyubiquitin-B                                              | UBB                    | 229  |
| 50 | P08670    | VIME_HUMAN   | Vimentin                                                     | VIM                    | 466  |
